# Supplementary material for: Efficacy of Curcumin on Aortic Atherosclerosis: A Systematic Review and Meta-Analysis in Mouse Studies and Insights into Possible Mechanisms
Source: Hindawi journal article supplement (doi:10.1155/2020/1520747), 2020-01-09
Supplement: f1 [file 1520747.f1.pdf]

## Supplementary Figures

### Efficacy of curcumin on aortic atherosclerosis: Meta-analysis of mice studies and insights into molecular mechanism

Firstly, a univariate meta-regression analysis was performed to clarify the relationship between SMD of aortic lesion area and overall dosage of curcumin included in our analyses.

Figure S1

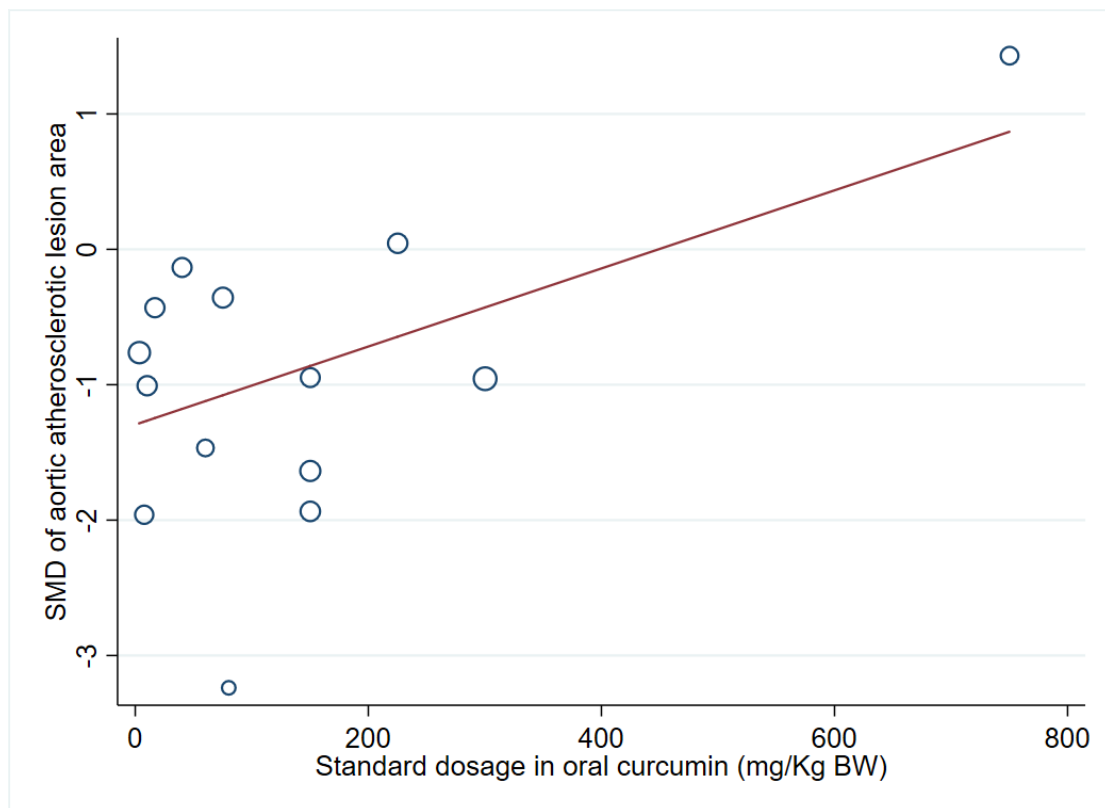

Figure S1. Dose-response between overall doses of curcumin and aortic atherosclerotic lesion area.

Univariate meta-regression analysis to reveal the linear relationship between SMD of aortic lesion area and standard dosage of curcumin.

**Figure S2**

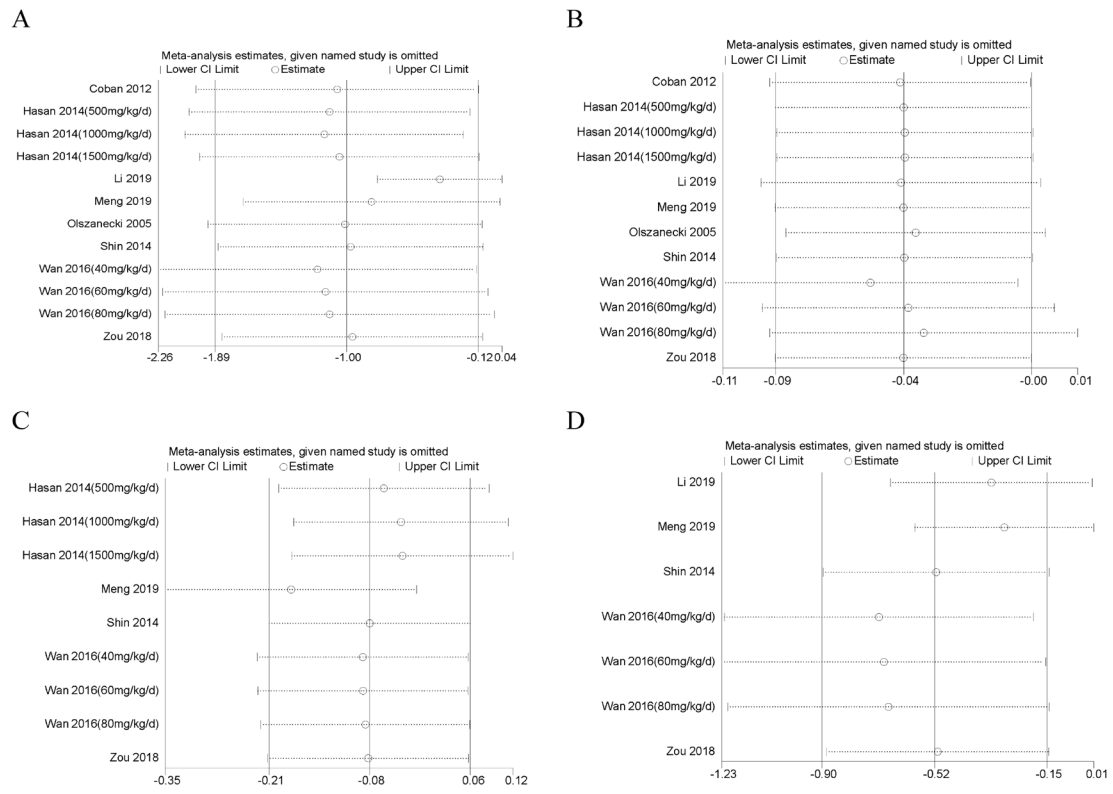

**Figure S2. Sensitivity analysis of curcumin on plasma lipid level.**

Sensitivity analysis of curcumin on serum Tc (A), TG (B), LDL-c (C) and HDL (D). Tc, total cholesterol; TG, triglyceride; LDL-c, low density lipoprotein cholesterol.

**Figure S3**

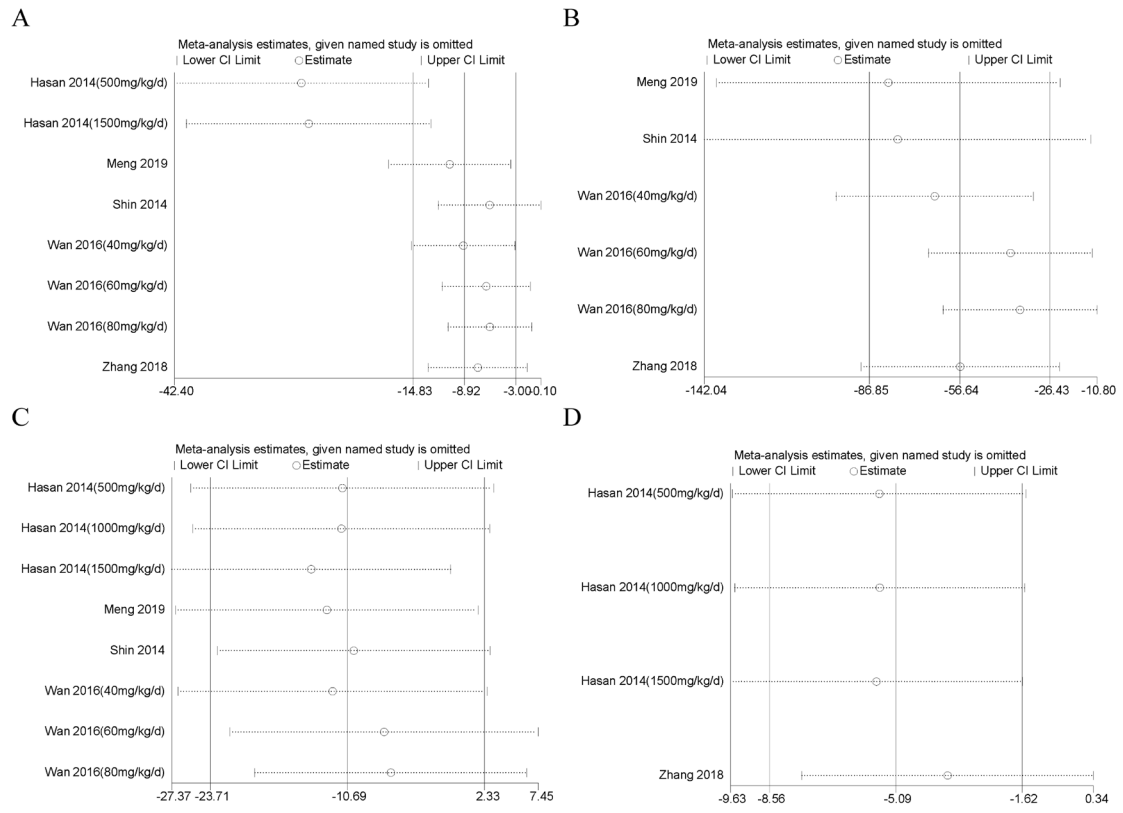

**Figure S3. Sensitivity analysis of curcumin on plasma inflammatory response level**

Sensitivity analysis of curcumin on serum TNF- $\alpha$  before omitting Hasan *et al.* (A) and after (B), IL-6 (C) and IL-1 $\beta$  (D). TNF- $\alpha$ , tumor necrosis factor  $\alpha$ ; IL-6, integrin 6; IL-1 $\beta$ , integrin 1 $\beta$ .
